# Supplementary material for: Tricoumaroylspermidine from rose exhibits inhibitory activity against ethanol-induced apoptosis in HepG2 cells
Source: Royal Society of Chemistry journal article supplement (doi:10.1039/d1fo00800e), 2021-01-01

## Fig. 4A p-AMPK (Cell signaling 4223)

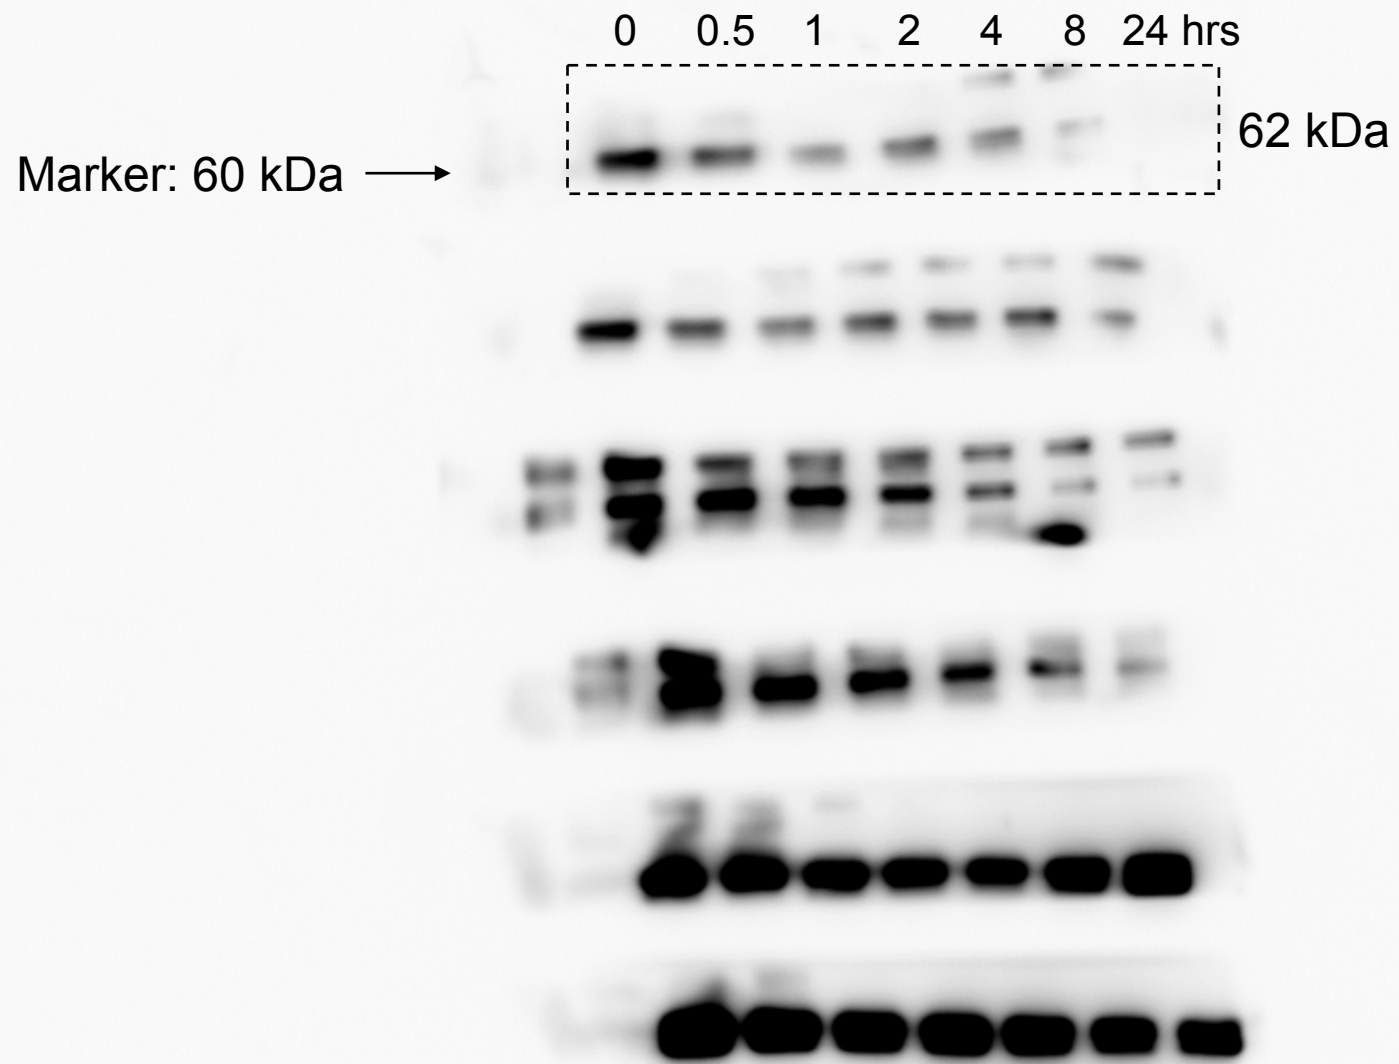

**Fig. 4A**

**t-AMPK (Cell signaling 5831)**

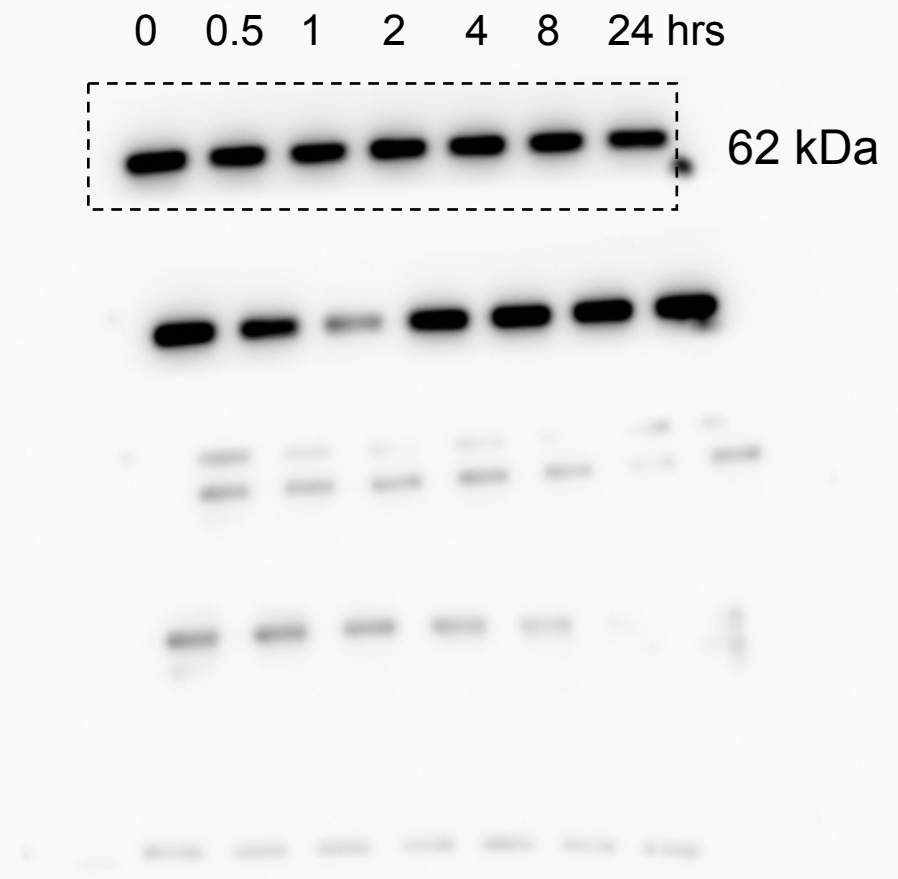

**Fig. 4A**

**SIRT1 (Abcam ab32441)**

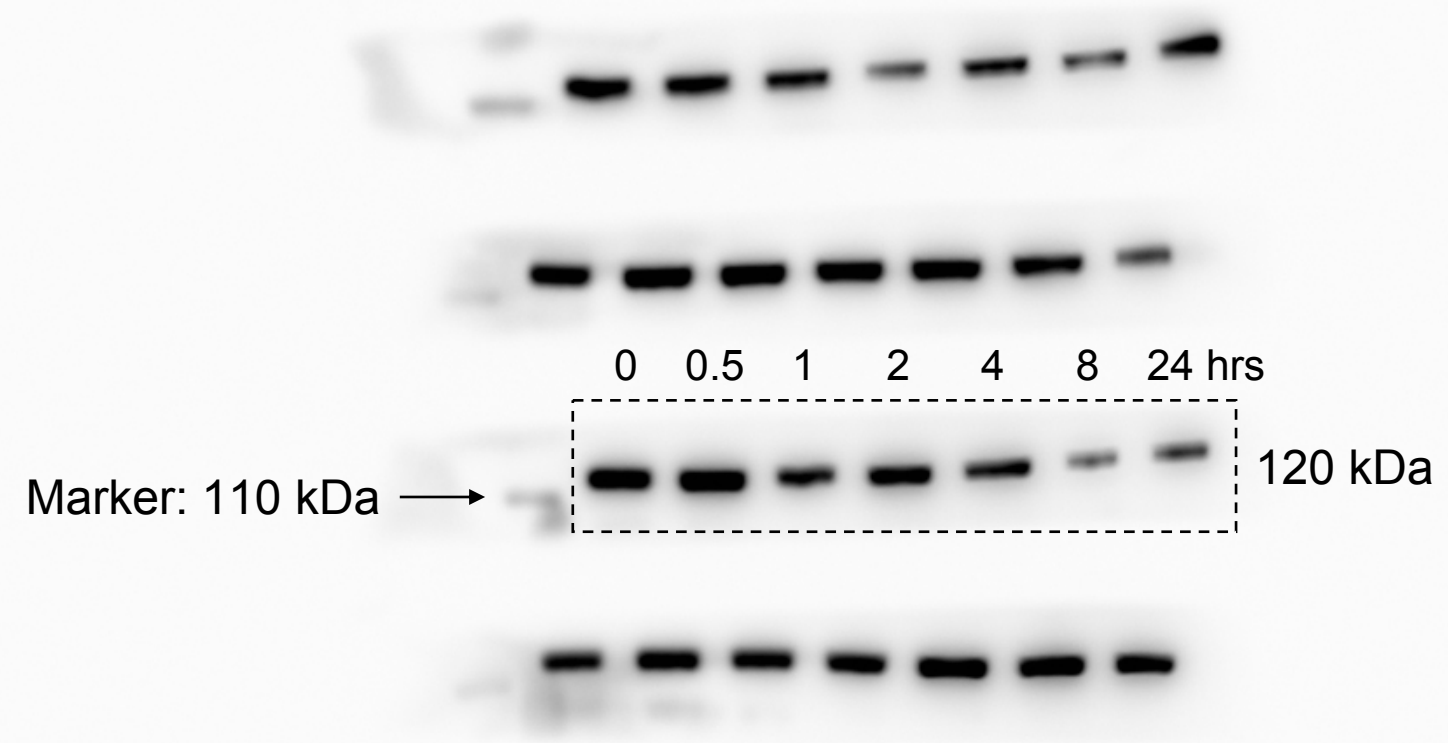

**Fig. 4A**

**$\beta$ -actin (Cell signaling 3700)**

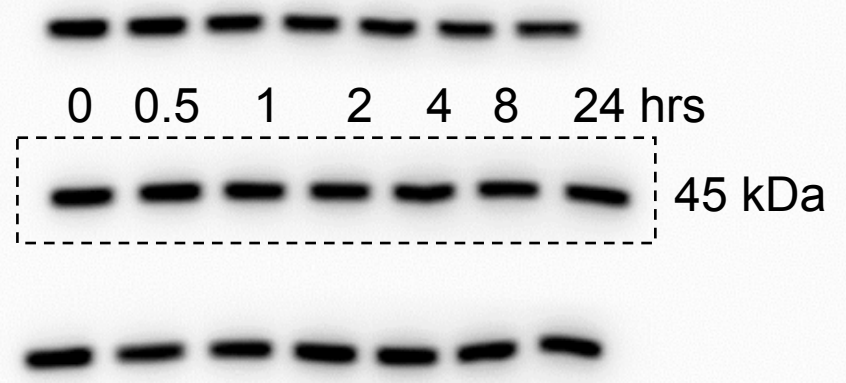

**Fig. 4B**

**p-AMPK (Cell signaling 4223)**

|       |   |   |    |   |    |    |
|-------|---|---|----|---|----|----|
| SFN:  | - | - | 10 | - | -  | -  |
| SLs:  | - | - | -  | 5 | 25 | 50 |
| EtOH: | - | + | +  | + | +  | +  |

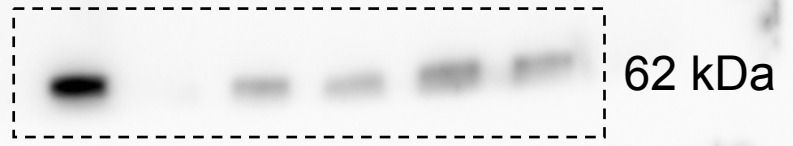

**Fig. 4B**

**t-AMPK (Cell signaling 5831)**

|       |   |   |    |   |    |    |
|-------|---|---|----|---|----|----|
| SFN:  | - | - | 10 | - | -  | -  |
| SLs:  | - | - | -  | 5 | 25 | 50 |
| EtOH: | - | + | +  | + | +  | +  |

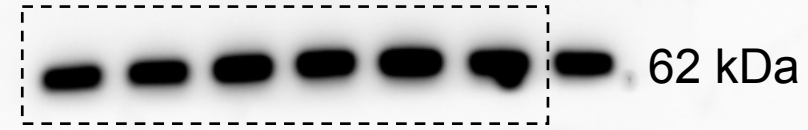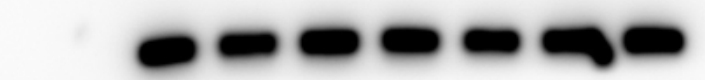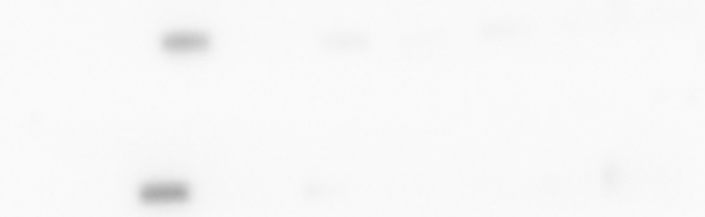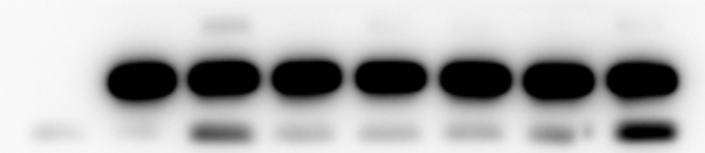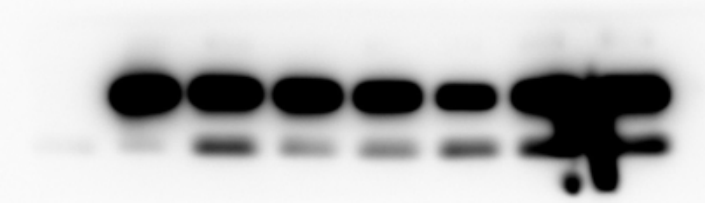

Fig. 4B

SIRT1 (Abcam ab32441)

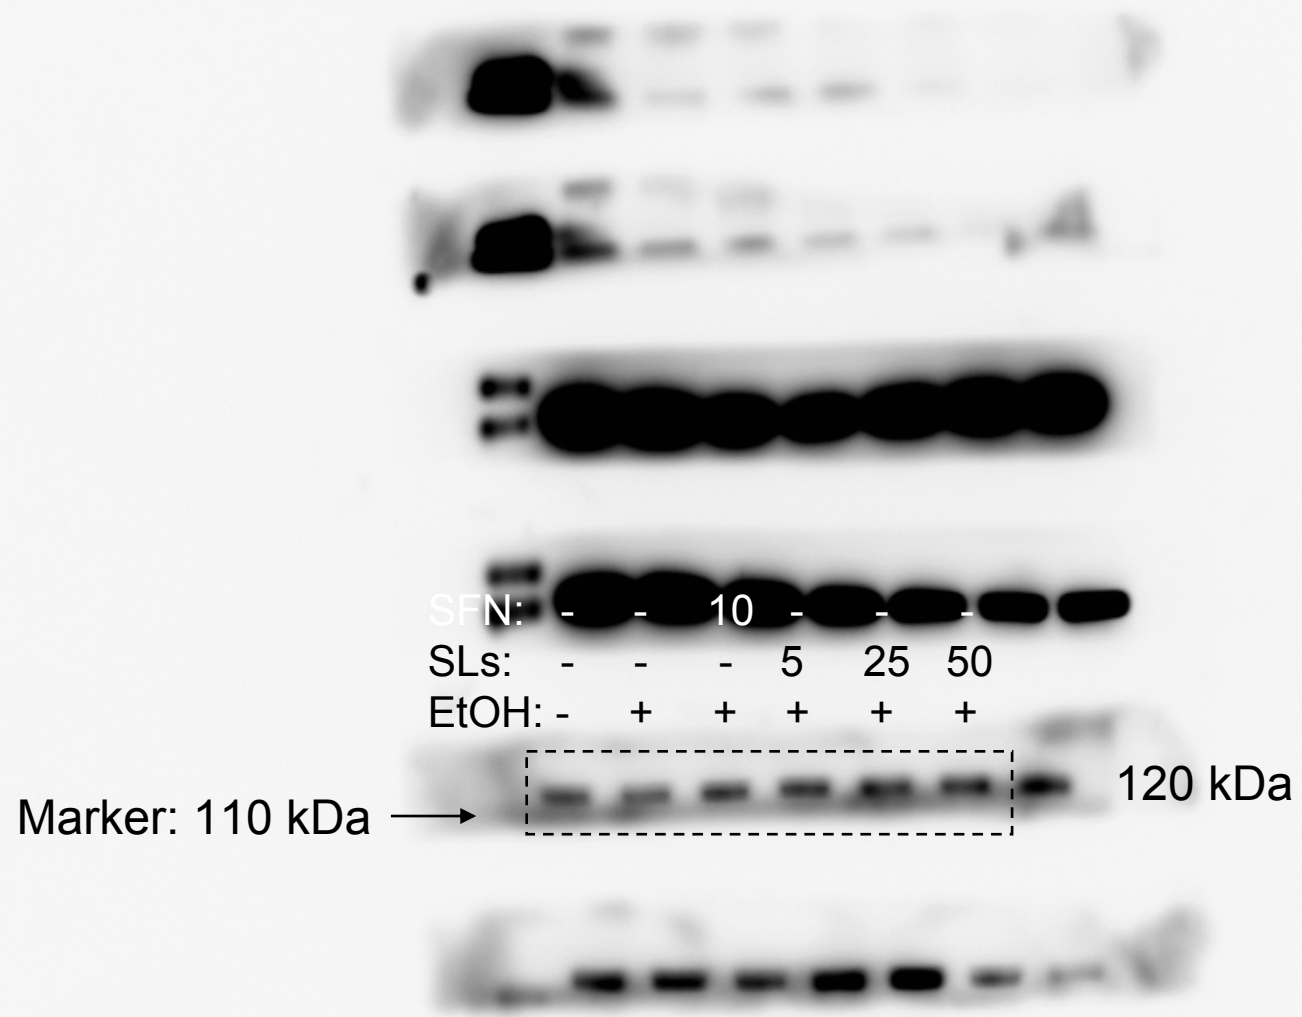

Fig. 4A

$\beta$ -actin (Cell signaling 3700)

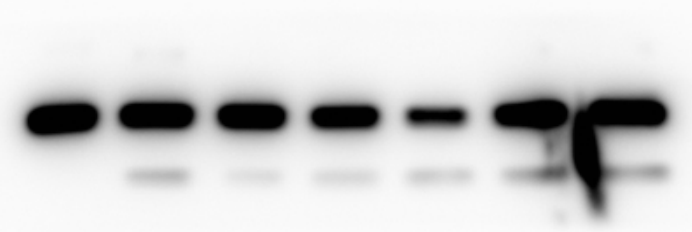

|       |   |   |    |   |    |    |
|-------|---|---|----|---|----|----|
| SFN:  | - | - | 10 | - | -  | -  |
| SLs:  | - | - | -  | 5 | 25 | 50 |
| EtOH: | - | + | +  | + | +  | +  |

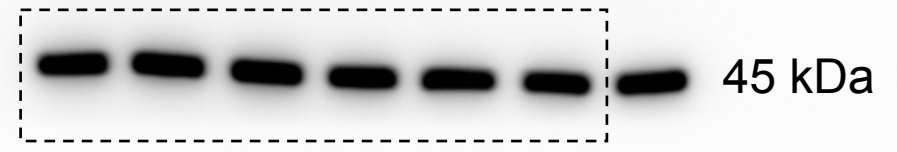

Supplement: d1fo00800e2.pdf [file d1fo00800e2.pdf]
