# Supplementary material for: Tricoumaroylspermidine from rose exhibits inhibitory activity against ethanol-induced apoptosis in HepG2 cells
Source: Royal Society of Chemistry journal article supplement (doi:10.1039/d1fo00800e), 2021-01-01

### Bcl-2 (Cell signaling 4223)

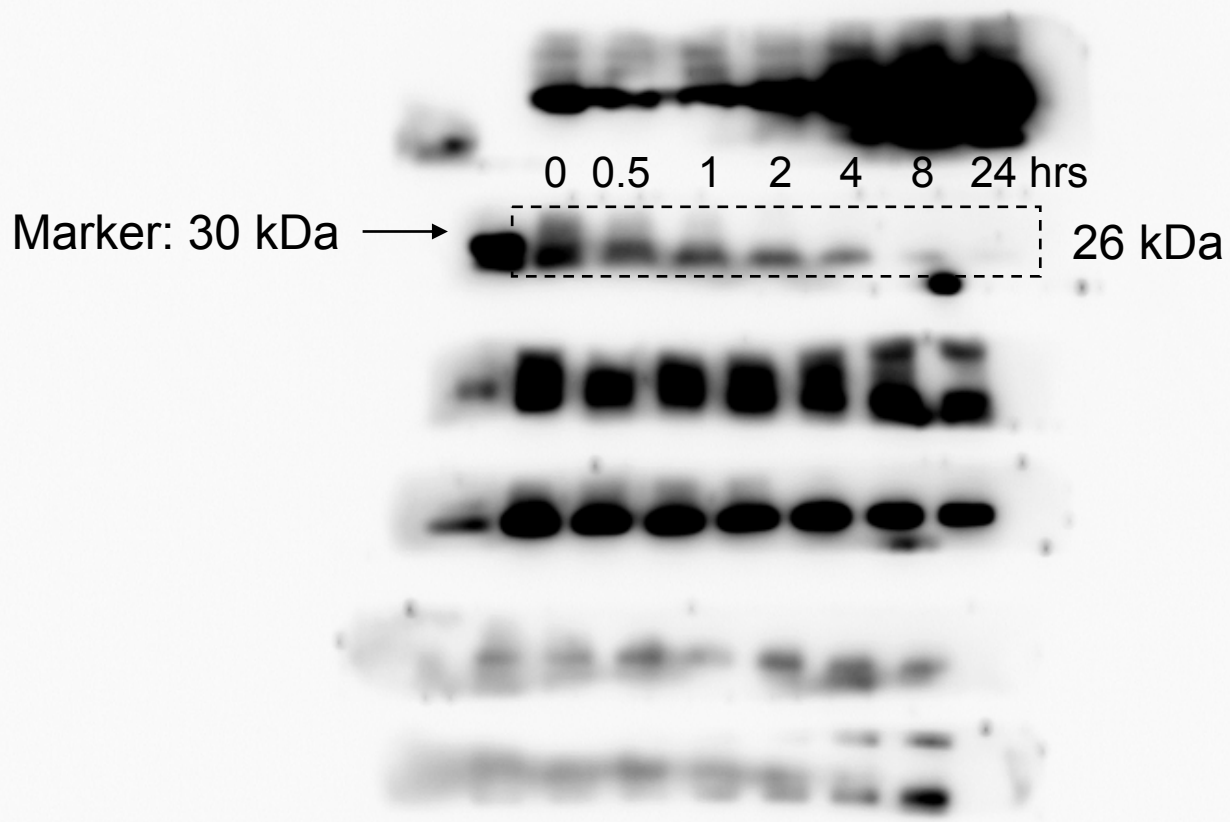

**Fig. 3I**

**Bax (Cell signaling 5023)**

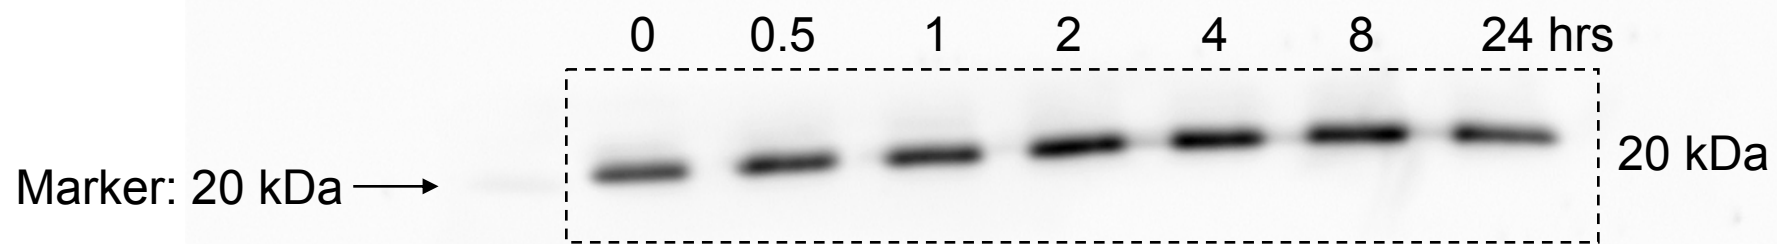

**Fig. 3I**

**Caspase-3 (Cell signaling 9662)**

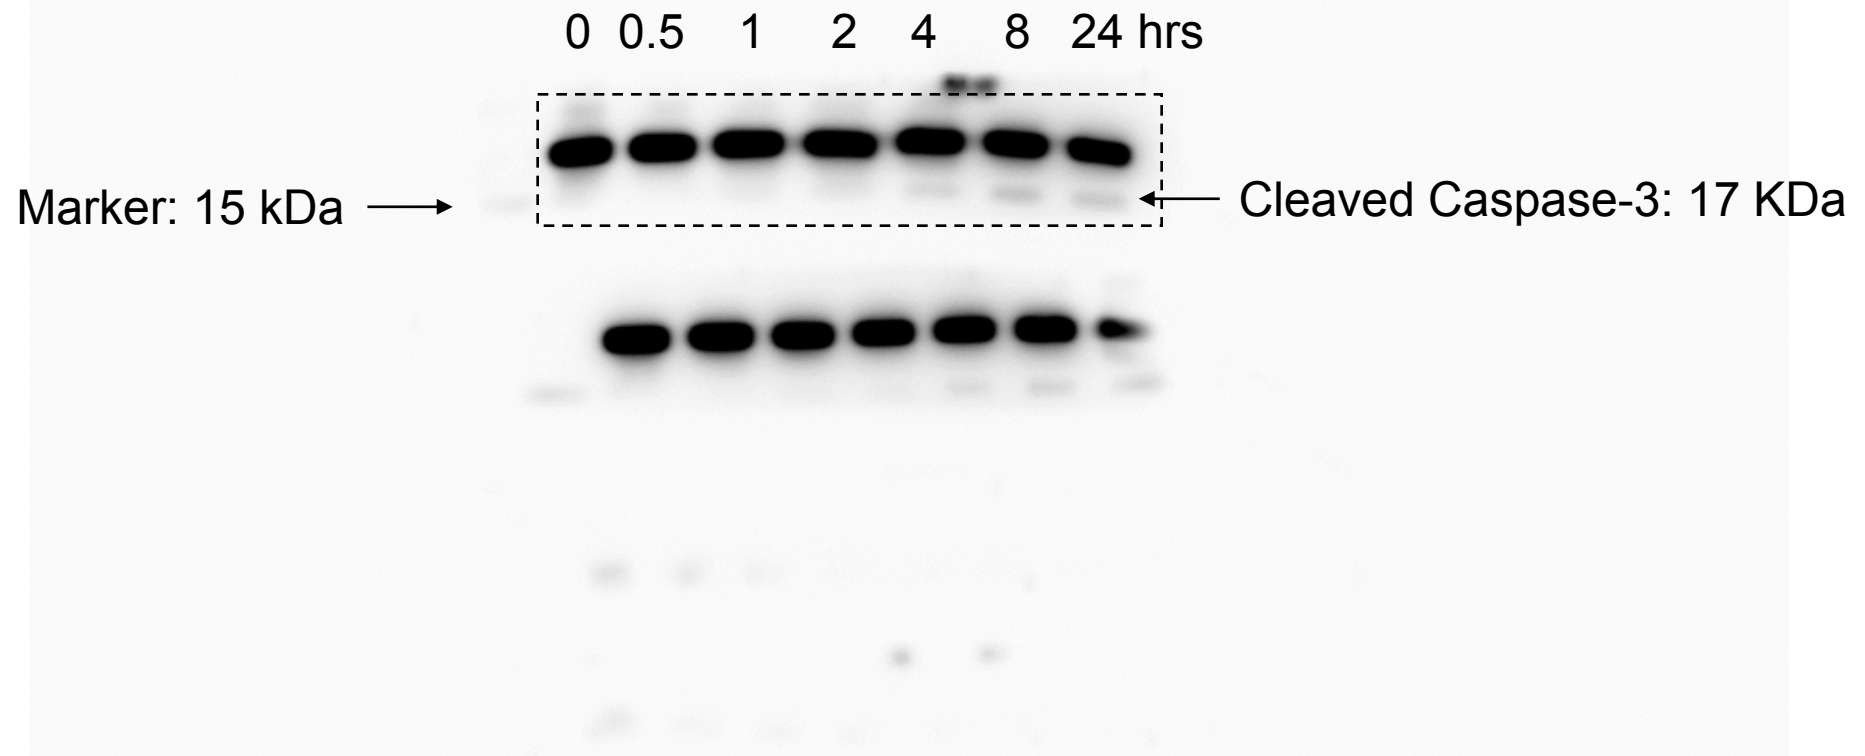

**Fig. 3I**

**Cleaved PARP (Cell signaling 9541)**

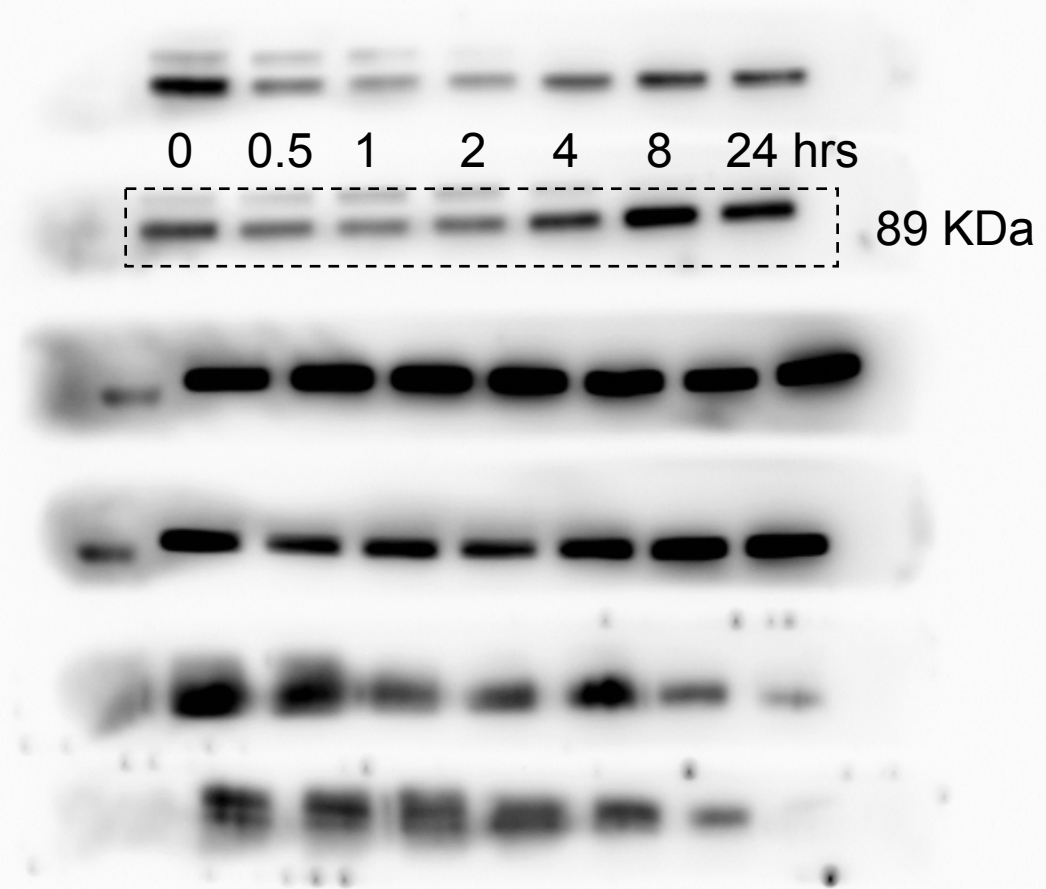

**Fig. 3I**

**$\beta$ -actin (Cell signaling 3700)**

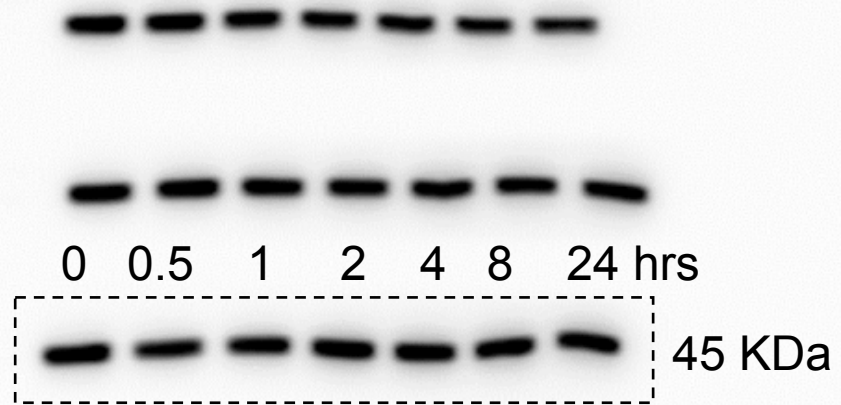

**Fig. 3L**

**Bcl-2 (Cell signaling 4223)**

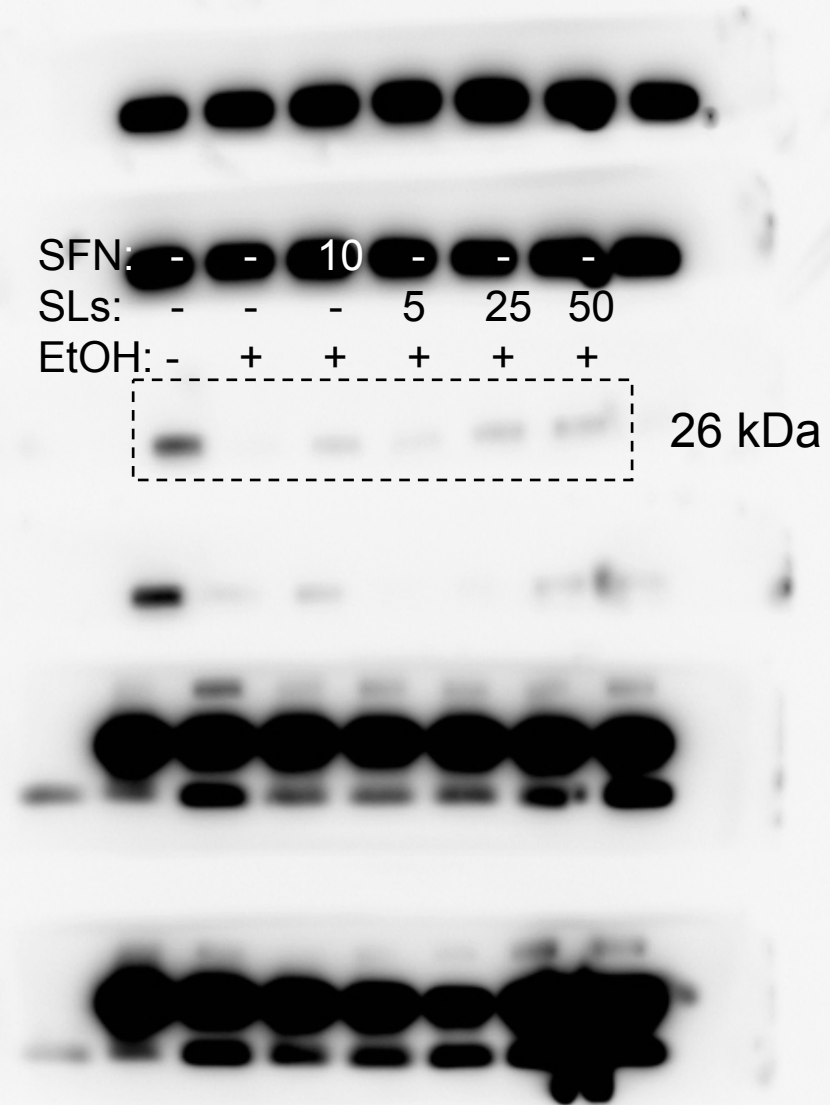

**Fig. 3L**

**Bax (Cell signaling 5023)**

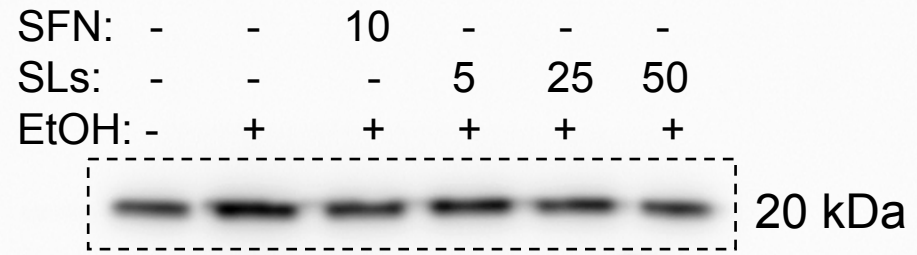

**Fig. 3L**

**Caspase-3 (Cell signaling 9662)**

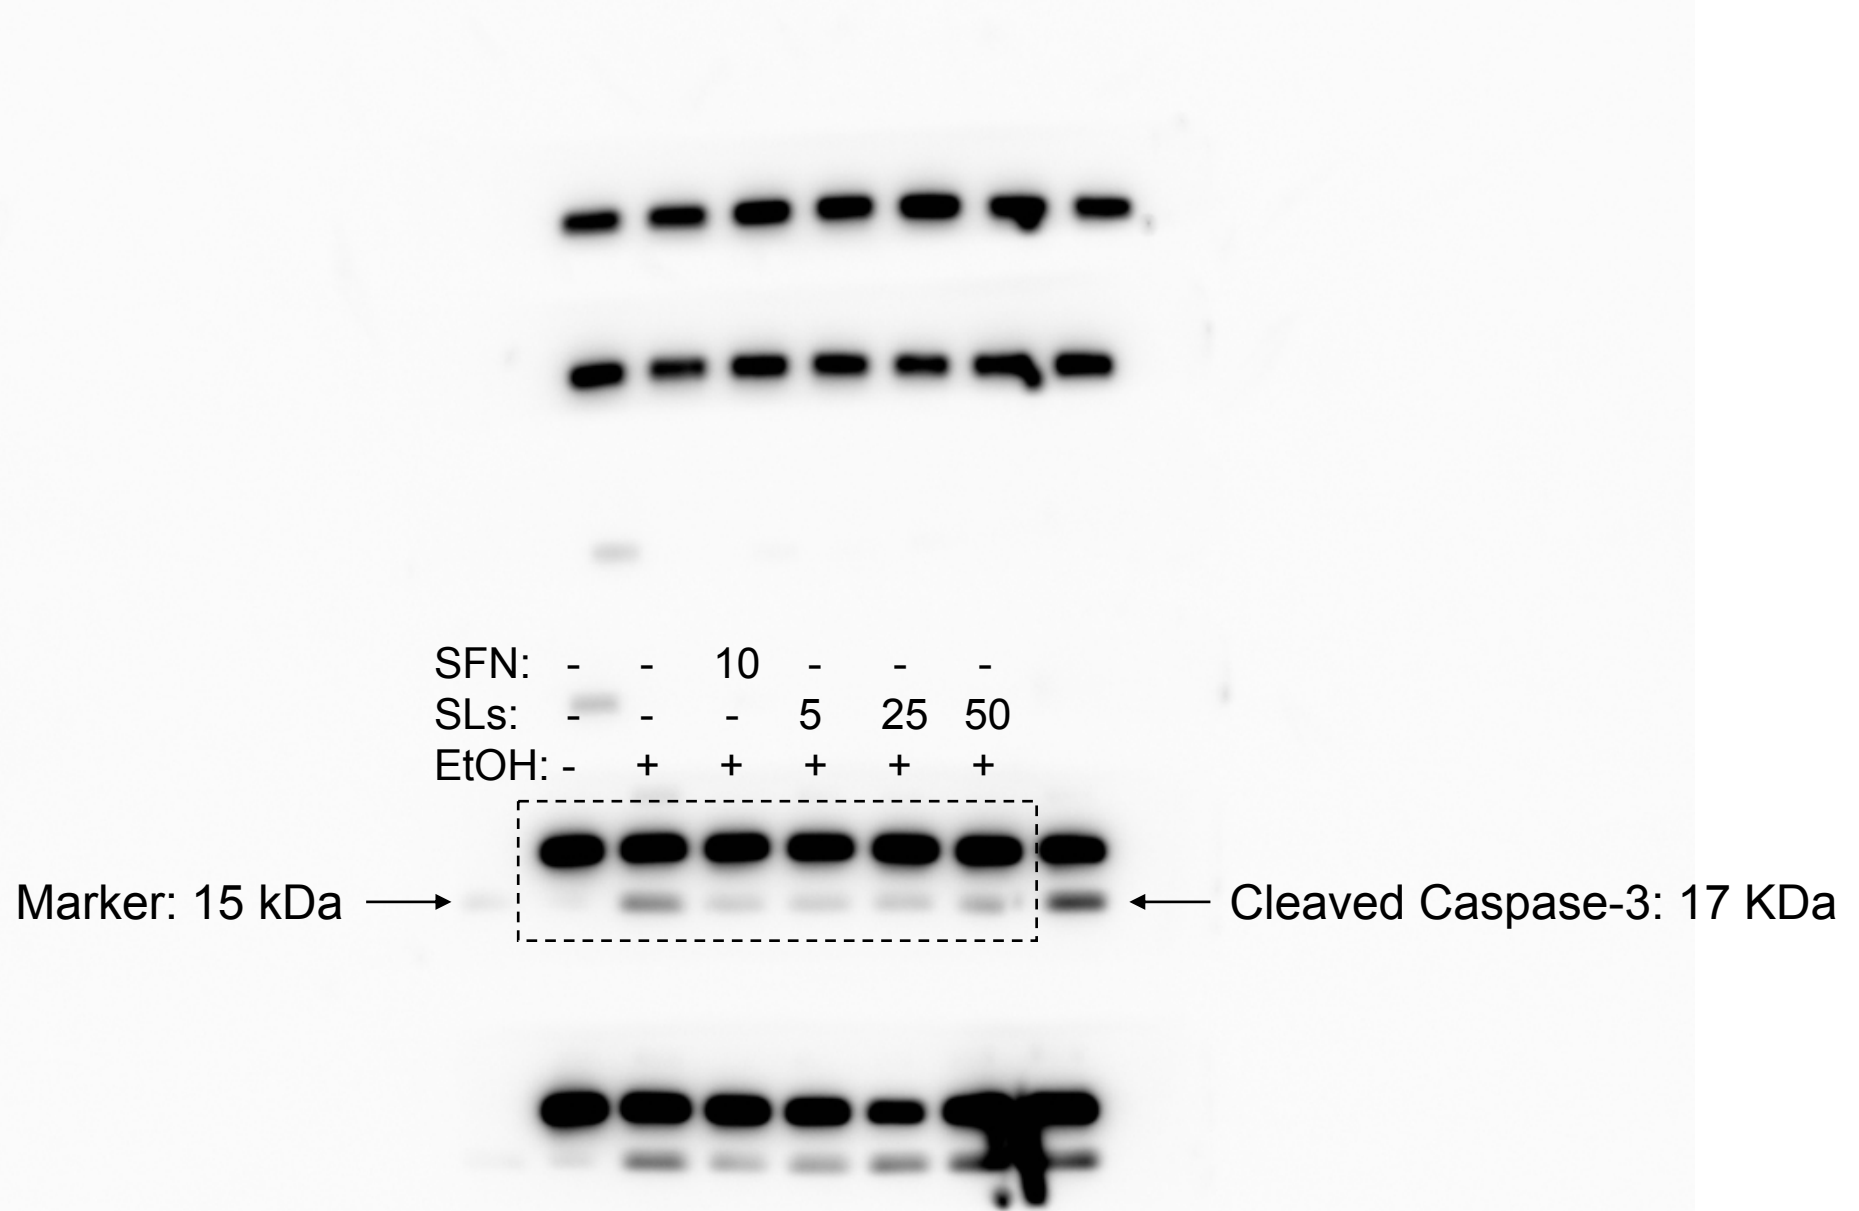



**Fig. 3L**

**Cleaved PARP (Cell signaling 9541)**

|       |   |   |    |   |    |    |
|-------|---|---|----|---|----|----|
| SFN:  | - | - | 10 | - | -  | -  |
| SLs:  | - | - | -  | 5 | 25 | 50 |
| EtOH: | - | + | +  | + | +  | +  |

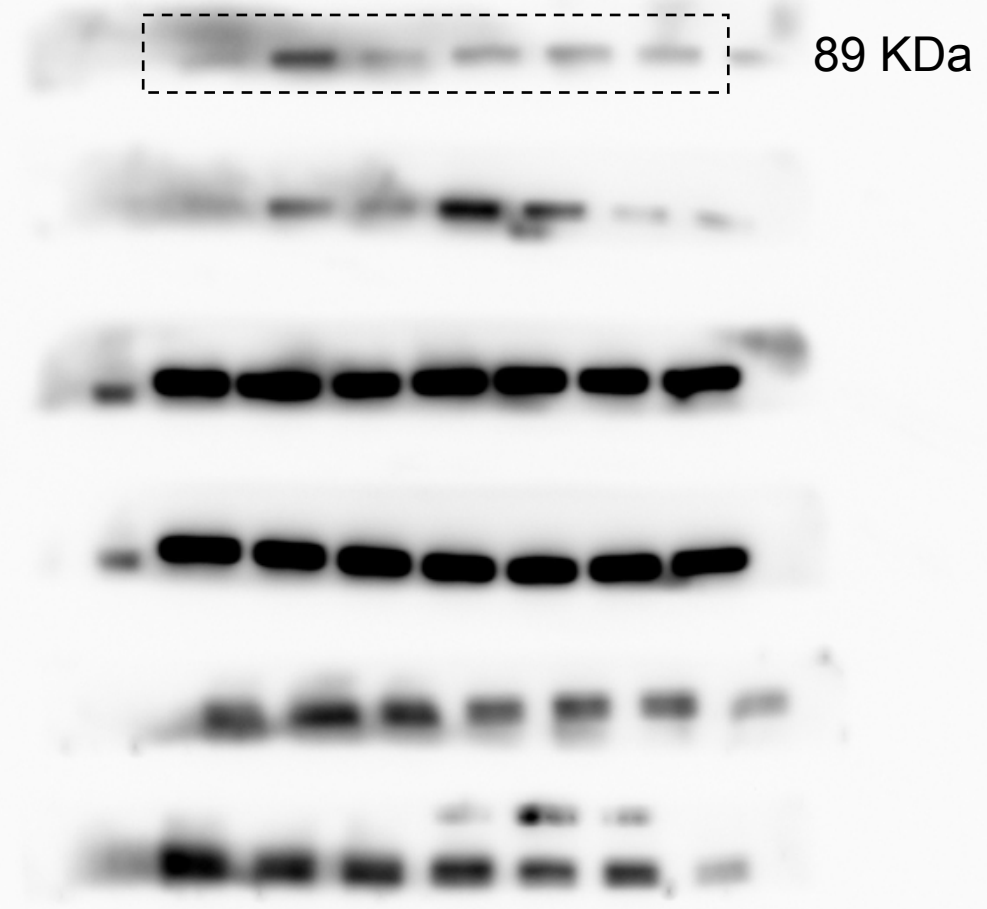

**Fig. 3L**

**$\beta$ -actin (Cell signaling 3700)**

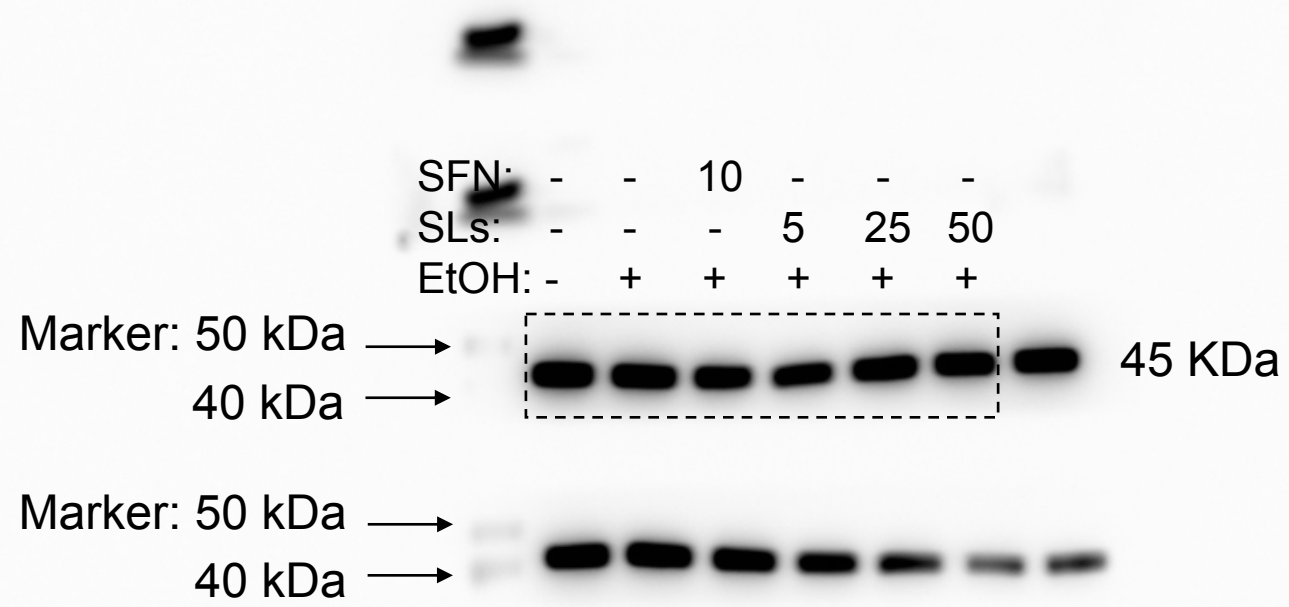

Supplement: d1fo00800e1.pdf [file d1fo00800e1.pdf]
