# Supplementary material for: Tricoumaroylspermidine from rose exhibits inhibitory activity against ethanol-induced apoptosis in HepG2 cells
Source: Royal Society of Chemistry journal article supplement (doi:10.1039/d1fo00800e), 2021-01-01
Supplement: d1fo00800e3.xlsx [file d1fo00800e3.xlsx]

## Sheet: Fig. 3I
Fig. 3I Time curve of EtOH (Apotosis related proteins)
(1) IntDen data (From Image J analysis)
β-actin	0	0.5	1	2	4	8	24	hrs
	205042	181960	182728	199942	191056	184253	189606
	201661	179462	180139	196345	189075	180805	187201
	202526	178461	179621	198080	188857	181962	187751
Ave.	203076	179961	180829	198122	189663	182340	188186
t-Caspase 3	0	0.5	1	2	4	8	24
	309680	336026	345936	354812	342834	321211	288539
	309835	329115	337136	343498	330709	310641	285346
	311269	328182	338392	341160	330709	310641	281249
Ave.	310261	331108	340488	346490	334751	314164	285045
Cleaved Caspase-3	0	0.5	1	2	4	8	24
	10398	3568	10324	14823	17678	22178	22741
	8783	4566	10586	16167	16060	21709	23190
	8010	3565	7273	16141	16089	22412	22813
Cleaved PARP	0	0.5	1	2	4	8	24
	143714	97500	82937	97796	138351	205922	172553
	143650	96139	83461	96674	135188	206454	172954
	138707	92311	80651	93744	132053	197629	167518
Bcl-2	0	0.5	1	2	4	8	24
	265455	194884	173798	143482	93553	42995	11891
	251307	189252	171932	140283	94611	35040	12758
	278217	205941	185714	151907	96792	38151	11584
Bax	0	0.5	1	2	4	8	24
	106954	132900	136504	158888	156013	167824	124944
	113836	137335	141910	168520	163518	176630	131385
	111668	136245	140216	165376	159187	173424	127792
(2) Target proteins/β-actin
β-actin	0	0.5	1	2	4	8	24	hrs
	1.00968	1.01111	1.0105	1.00918	1.00735	1.01049	1.00755
	0.993031	0.997227	0.996182	0.991029	0.996902	0.991582	0.994766
	0.99729	0.991665	0.993318	0.999786	0.995752	0.997927	0.997688
Ave.	1	1	1	1	1	1	1
t-Caspase 3	0	0.5	1	2	4	8	24
	0.998126	1.01485	1.016	1.02402	1.02415	1.02243	1.01226
	0.998626	0.993982	0.990155	0.991365	0.987926	0.988785	1.00106
	1.00325	0.991164	0.993844	0.984617	0.987926	0.988785	0.986684
Ave.	1	1	1	1	1	1	1
Cleaved Caspase-3	0	0.5	1	2	4	8	24
	0.0335137	0.010776	0.0303212	0.0427805	0.0528095	0.0705936	0.0797805
	0.0283084	0.0137901	0.0310907	0.0466594	0.047976	0.0691008	0.0813557
	0.0258169	0.0107669	0.0213605	0.0465843	0.0480626	0.0713385	0.0800331
Ave.	0.029213	0.0117776	0.0275908	0.0453414	0.049616	0.0703443	0.0803897
Cleaved PARP	0	0.5	1	2	4	8	24
	0.707685	0.541784	0.458648	0.493614	0.729458	1.12933	0.916928
	0.707369	0.534221	0.461546	0.487951	0.712781	1.13225	0.919059
	0.683029	0.51295	0.446006	0.473162	0.696252	1.08385	0.890172
Ave.	0.699361	0.529652	0.4554	0.484909	0.71283	1.11514	0.90872
Bcl-2	0	0.5	1	2	4	8	24
	1.30717	1.08292	0.961116	0.724209	0.49326	0.235796	0.0631875
	1.2375	1.05163	0.950797	0.708063	0.498838	0.192168	0.0677946
	1.37001	1.14436	1.02701	0.766733	0.510338	0.20923	0.0615561
Ave.	1.30489	1.09297	0.979642	0.733002	0.500812	0.212398	0.0641794
Bax	0	0.5	1	2	4	8	24
	0.526669	0.738493	0.754878	0.801969	0.822581	0.92039	0.663939
	0.560558	0.763138	0.784773	0.850586	0.862152	0.968685	0.698166
	0.549882	0.757081	0.775405	0.834717	0.839316	0.951102	0.679073
Ave.	0.545703	0.752904	0.771685	0.82909	0.84135	0.946726	0.680392
(3) Target sample/Ctl (For figure drawing)
Cleaved Caspase-3	0	0.5	1	2	4	8	24	hrs
	1.14722	0.368875	1.03793	1.46443	1.80774	2.41651	2.73099
	0.969034	0.472053	1.06427	1.59721	1.64228	2.36541	2.78491
	0.883748	0.368565	0.731199	1.59464	1.64525	2.44201	2.73964
Ave.	1	0.403164	0.944469	1.5521	1.69842	2.40798	2.75185
SD.	0.134437	0.0596593	0.185167	0.0759299	0.0946812	0.0390062	0.0289597
Cleaved PARP	0	0.5	1	2	4	8	24
	1.0119	0.774684	0.65581	0.705807	1.04304	1.6148	1.31109
	1.01145	0.763871	0.659953	0.69771	1.01919	1.61897	1.31414
	0.976647	0.733455	0.637734	0.676564	0.995554	1.54977	1.27284
Ave.	1	0.757337	0.651166	0.69336	1.01926	1.59452	1.29936
SD.	0.0202255	0.021377	0.0118154	0.0150993	0.0237406	0.0388068	0.0230177
Bcl-2	0	0.5	1	2	4	8	24
	1.00174	0.829894	0.736548	0.554995	0.378008	0.180701	0.0484235
	0.948353	0.805911	0.72864	0.542621	0.382283	0.147268	0.0519541
	1.0499	0.876979	0.787047	0.587583	0.391095	0.160343	0.0471733
Ave.	1	0.837595	0.750745	0.561733	0.383795	0.16277	0.0491836
SD.	0.0507974	0.0361546	0.0316864	0.0232261	0.00667352	0.0168485	0.00247942
Bax	0	0.5	1	2	4	8	24
	0.96512	1.35329	1.38331	1.46961	1.50738	1.68661	1.21667
	1.02722	1.39845	1.4381	1.5587	1.57989	1.77511	1.27939
	1.00766	1.38735	1.42093	1.52962	1.53805	1.74289	1.2444
Ave.	1	1.3797	1.41411	1.51931	1.54177	1.73487	1.24682
SD.	0.0317509	0.0235331	0.0280208	0.0454308	0.0363996	0.0447915	0.0314301

## Sheet: Fig. 3L
Fig. 3L Anti-apoptosis effects
(1) IntDen data (From Image J analysis)
β-actin	Ctl	EtOH	SFN	SLs-5	SLs-25	SLs-50	μg/mL
	290928	289053	253323	244022	285944	276895
	290928	291419	252447	244047	285944	276895
	291818	291885	253428	243427	286009	275965
Ave.	291225	290786	253066	243832	285966	276585
t-Caspase 3	Ctl	EtOH	SFN	SLs-5	SLs-25	SLs-50
	382066	373359	373176	393144	391697	275965
	390645	379506	378093	366348	396471	392900
	392000	382368	377638	373260	395073	392498
Ave.	388237	378411	376302	377584	394414	353788
Cleaved Caspase-3	Ctl	EtOH	SFN	SLs-5	SLs-25	SLs-50
	8843	64318	19106	19366	22709	34543
	8074	63248	18334	19263	22734	33875
	8742	64368	18645	19013	23291	33911
Cleaved PARP	Ctl	EtOH	SFN	SLs-5	SLs-25	SLs-50
	85563	175819	96287	78896	63035	51327
	87559	178064	99565	79679	62249	51327
	89526	166044	89582	73281	58313	47324
Bcl-2	Ctl	EtOH	SFN	SLs-5	SLs-25	SLs-50
	157878	30105	38337	32923	45705	51213
	161706	30480	38505	32971	46660	50963
	164293	32535	41710	35517	48936	54127
Bax	Ctl	EtOH	SFN	SLs-5	SLs-25	SLs-50
	121739	189375	151148	164223	140324	111615
	121515	189272	150982	163830	141199	111659
	114218	179014	141108	158077	131169	105966
(2) Target proteins/β-actin
β-actin	Ctl	EtOH	SFN	SLs-5	SLs-25	SLs-50	μg/mL
	0.998981	0.994041	1.00102	1.00078	0.999924	1.00112
	0.998981	1.00218	0.997554	1.00088	0.999924	1.00112
	1.00204	1.00378	1.00143	0.998339	1.00015	0.997758
Ave.	1	1	1	1	1	1
t-Caspase 3	Ctl	EtOH	SFN	SLs-5	SLs-25	SLs-50
	0.984105	0.986649	0.991692	1.04121	0.993112	0.78003
	1.0062	1.00289	1.00476	0.970242	1.00522	1.11055
	1.00969	1.01046	1.00355	0.988548	1.00167	1.10942
Ave.	1	1	1	1	1	1
Cleaved Caspase-3	Ctl	EtOH	SFN	SLs-5	SLs-25	SLs-50
	0.0227773	0.169969	0.050773	0.0512892	0.0575766	0.0976377
	0.0207966	0.167141	0.0487215	0.0510165	0.05764	0.0957495
	0.0225172	0.170101	0.0495479	0.0503544	0.0590522	0.0958513
Ave.	0.0220304	0.16907	0.0496808	0.0508867	0.0580896	0.0964128
Cleaved PARP	Ctl	EtOH	SFN	SLs-5	SLs-25	SLs-50
	0.293804	0.604634	0.380482	0.323567	0.220429	0.185574
	0.300658	0.612355	0.393435	0.326778	0.21768	0.185574
	0.307412	0.571019	0.353987	0.300539	0.203916	0.171101
Ave.	0.300625	0.596003	0.375968	0.316961	0.214008	0.18075
Bcl-2	Ctl	EtOH	SFN	SLs-5	SLs-25	SLs-50
	0.542118	0.10353	0.15149	0.135023	0.159827	0.185162
	0.555262	0.104819	0.152154	0.13522	0.163166	0.184258
	0.564145	0.111887	0.164819	0.145662	0.171125	0.195698
Ave.	0.553842	0.106745	0.156154	0.138635	0.164706	0.188372
Bax	Ctl	EtOH	SFN	SLs-5	SLs-25	SLs-50
	0.418024	0.651253	0.597267	0.673509	0.490702	0.403547
	0.417255	0.650899	0.596611	0.671897	0.493762	0.403706
	0.392199	0.615622	0.557594	0.648303	0.458688	0.383123
Ave.	0.409159	0.639258	0.583824	0.66457	0.481051	0.396792
(3) Target sample/Ctl (For figure drawing)
Cleaved Caspase-3	Ctl	EtOH	SFN	SLs-5	SLs-25	SLs-50	μg/mL
	1.03391	7.7152	2.30468	2.32812	2.61351	4.43196
	0.943996	7.58685	2.21156	2.31573	2.61639	4.34625
	1.0221	7.7212	2.24907	2.28568	2.68049	4.35087
Ave.	1	7.67442	2.25511	2.30984	2.6368	4.37636
SD.	0.0488587	0.075894	0.0468538	0.0218229	0.0378681	0.0482045
Cleaved PARP	Ctl	EtOH	SFN	SLs-5	SLs-25	SLs-50
	0.977312	2.01126	1.26564	1.07632	0.733235	0.617295
	1.00011	2.03694	1.30872	1.087	0.724092	0.617295
	1.02258	1.89944	1.1775	0.999715	0.678308	0.569152
Ave.	1	1.98255	1.25062	1.05434	0.711878	0.601247
SD.	0.0226332	0.0731093	0.0668866	0.0476097	0.0294301	0.0277953
Bcl-2	Ctl	EtOH	SFN	SLs-5	SLs-25	SLs-50
	0.978831	0.18693	0.273526	0.243794	0.288579	0.334323
	1.00256	0.189259	0.274725	0.24415	0.294608	0.332691
	1.0186	0.202019	0.297592	0.263003	0.308979	0.353346
Ave.	1	0.192736	0.281948	0.250315	0.297389	0.34012
SD.	0.0200099	0.00812307	0.0135615	0.0109889	0.0104805	0.011483
Bax	Ctl	EtOH	SFN	SLs-5	SLs-25	SLs-50
	1.02167	1.59168	1.45974	1.64608	1.19929	0.986282
	1.01979	1.59082	1.45814	1.64214	1.20677	0.986671
	0.958548	1.5046	1.36278	1.58447	1.12105	0.936365
Ave.	1	1.56237	1.42689	1.62423	1.1757	0.969773
SD.	0.035911	0.0500297	0.0555248	0.0344863	0.0474805	0.0289326

## Sheet: Fig. 4A
Fig. 4A Time curve of EtOH (AMPK and SIRT1)
(1) IntDen data (From Image J analysis)
β-actin	0	0.5	1	2	4	8	24	hrs
	187913	196156	182730	177661	173839	171141	181911
	188854	196156	183983	176499	177285	171141	179484
	189234	196981	184713	177386	176954	170203	180756
Ave.	188667	196431	183809	177182	176026	170828	180717
t-AMPK	0	0.5	1	2	4	8	24	hrs
	277146	253503	246493	259586	257433	244815	237542
	277595	253952	246497	260086	257750	244530	237321
	276107	253535	243892	257689	253840	242364	236160
Ave.	276949	253663	245627	259120	256341	243903	237008
p-AMPK	0	0.5	1	2	4	8	24	hrs
	336690	262814	140661	198251	168041	74143	53196
	322021	259455	138356	194345	165710	70960	54174
	310391	242228	130080	183629	152533	61764	45804
Sirt 1	0	0.5	1	2	4	8	24	hrs
	57058	66322	42268	51061	42322	22914	28179
	56442	65918	39237	51385	43514	19573	27196
	53803	62242	37129	48980	40862	18665	26476
(2) Target proteins/β-actin
β-actin	0	0.5	1	2	4	8	24	hrs
	0.996004	0.9986	0.994132	1.0027	0.987576	1.00183	1.00661
	1.00099	0.9986	1.00095	0.996145	1.00715	1.00183	0.993177
	1.00301	1.0028	1.00492	1.00115	1.00527	0.996339	1.00022
Ave.	1	1	1	1	1	1	1
t-AMPK	0	0.5	1	2	4	8	24	hrs
	1.00071	0.999368	1.00352	1.0018	1.00426	1.00374	1.00225
	1.00233	1.00114	1.00354	1.00373	1.0055	1.00257	1.00132
	0.996959	0.999494	0.992935	0.994476	0.990243	0.99369	0.996423
Ave.	1	1	1	1	1	1	1
p-AMPK	0	0.5	1	2	4	8	24	hrs
	1.21571	1.03607	0.57266	0.765092	0.655537	0.303986	0.224448
	1.16274	1.02283	0.563276	0.750018	0.646444	0.290935	0.228575
	1.12075	0.954919	0.529583	0.708663	0.595039	0.253232	0.19326
Ave.	1.1664	1.00461	0.555173	0.741258	0.63234	0.282718	0.215428
Sirt 1	0	0.5	1	2	4	8	24	hrs
	0.302427	0.337635	0.229957	0.288184	0.24043	0.134135	0.155929
	0.299162	0.335578	0.213467	0.290013	0.247202	0.114577	0.150489
	0.285174	0.316864	0.201998	0.276439	0.232136	0.109262	0.146505
Ave.	0.295588	0.330026	0.21514	0.284878	0.239923	0.119324	0.150975
(3) Target sample/Ctl (For figure drawing)
AMPK	0	0.5	1	2	4	8	24	hrs
	1.04227	0.888266	0.490963	0.655943	0.562017	0.260618	0.192428
	0.996864	0.876913	0.482918	0.643019	0.554221	0.24943	0.195966
	0.960862	0.818689	0.454031	0.607564	0.51015	0.217105	0.165689
Ave.	1	0.861289	0.475971	0.635509	0.542129	0.242385	0.184694
SD.	0.0407967	0.0373272	0.0194213	0.0250488	0.0279678	0.0225959	0.016554
Sirt 1	0	0.5	1	2	4	8	24	hrs
	1.02314	1.14225	0.777963	0.974952	0.813397	0.45379	0.527521
	1.01209	1.13529	0.722176	0.981138	0.836307	0.387624	0.509119
	0.964771	1.07198	0.683378	0.935218	0.785337	0.369642	0.495641
Ave.	1	1.11651	0.727839	0.963769	0.811681	0.403685	0.51076
SD.	0.0310055	0.0387178	0.0475465	0.0249192	0.0255281	0.0443132	0.0160036

## Sheet: Fig. 4B
Fig. 4B Protective effects via AMPK/SIRT1
(1) IntDen data (From Image J analysis)
β-actin	Ctl	EtOH	SFN	SLs-5	SLs-25	SLs-50	μg/mL
	236565	256044	256268	234508	234457	215243
	238798	254108	256268	234713	235550	214494
	236100	251628	256597	231008	230709	210216
Ave.	237154	253927	256378	233410	233572	213318
t-AMPK	Ctl	EtOH	SFN	SLs-5	SLs-25	SLs-50
	246591	262746	291428	286249	311019	295730
	247307	260875	291428	287366	314253	295730
	235825	244060	288434	278656	313547	300397
Ave.	243241	255894	290430	284090	312940	297286
p-AMPK	Ctl	EtOH	SFN	SLs-5	SLs-25	SLs-50
	239367	25445	73913	63400	126874	97975
	228294	23523	70021	60584	120438	92386
	250781	27615	77820	66715	132827	102365
Sirt 1	Ctl	EtOH	SFN	SLs-5	SLs-25	SLs-50
	189448	158284	186665	204724	234942	238689
	192264	157813	166066	198583	234812	227736
	191225	151573	166135	184546	223012	210409
(2) Target proteins/β-actin
β-actin	Ctl	EtOH	SFN	SLs-5	SLs-25	SLs-50	μg/mL
	0.997515	1.00834	0.999572	1.00471	1.00379	1.00903
	1.00693	1.00071	0.999572	1.00558	1.00847	1.00551
	0.995554	0.990948	1.00086	0.989711	0.987743	0.98546
Ave.	1	1	1	1	1	1
t-AMPK	Ctl	EtOH	SFN	SLs-5	SLs-25	SLs-50
	1.01377	1.02678	1.00344	1.0076	0.993863	0.994767
	1.01672	1.01947	1.00344	1.01153	1.0042	0.994767
	0.969512	0.953756	0.993127	0.980871	1.00194	1.01047
Ave.	1	1	1	1	1	1
p-AMPK	Ctl	EtOH	SFN	SLs-5	SLs-25	SLs-50
	0.984073	0.0994358	0.254495	0.223168	0.405426	0.329565
	0.938551	0.0919249	0.241094	0.213256	0.38486	0.310765
	1.031	0.107916	0.267948	0.234837	0.424449	0.344332
Ave.	0.984541	0.0997589	0.254512	0.223754	0.404912	0.328221
Sirt 1	Ctl	EtOH	SFN	SLs-5	SLs-25	SLs-50
	0.798838	0.623345	0.728086	0.877102	1.00587	1.11894
	0.810713	0.62149	0.64774	0.850792	1.00531	1.06759
	0.806331	0.596916	0.648009	0.790653	0.954789	0.986365
Ave.	0.805294	0.613917	0.674612	0.839515	0.988654	1.05763
(3) Target sample/Ctl (For figure drawing)
p-AMPK	Ctl	EtOH	SFN	SLs-5	SLs-25	SLs-50	μg/mL
	0.999525	0.100997	0.258491	0.226673	0.411792	0.33474
	0.953288	0.0933683	0.24488	0.216605	0.390903	0.315645
	1.04719	0.10961	0.272155	0.238525	0.431114	0.349739
Ave.	1	0.101325	0.258509	0.227267	0.41127	0.333375
SD.	0.0469513	0.00812602	0.0136375	0.0109721	0.0201105	0.017088
Sirt 1	Ctl	EtOH	SFN	SLs-5	SLs-25	SLs-50
	0.991983	0.774059	0.904124	1.08917	1.24907	1.38948
	1.00673	0.771756	0.804352	1.0565	1.24837	1.32572
	1.00129	0.74124	0.804686	0.981819	1.18564	1.22485
Ave.	1	0.762352	0.837721	1.0425	1.22769	1.31335
SD.	0.00745646	0.0183193	0.0575075	0.0550282	0.036421	0.0830069
